# Supplementary material
Source: ML conference proceedings conference paper supplement (https://proceedings.neurips.cc/paper_files/paper/2020/hash/4f20f7f5d2e7a1b640ebc8244428558c-Abstract.html)
Supplement: Supplementary file [file 4f20f7f5d2e7a1b640ebc8244428558c-Supplemental.pdf]

# Implicit Distributional Reinforcement Learning: Appendix

## A Proof of Lemma 1

Denote

$$\mathcal{H} = \mathbb{E}_{\mathbf{a} \sim \pi_{\theta}(\mathbf{a}|\mathbf{s})} \log \pi_{\theta}(\mathbf{a}|\mathbf{s}),$$

and

$$\mathcal{H}_L = \mathbb{E}_{\boldsymbol{\xi}^{(0), \dots, (L)} \sim p(\boldsymbol{\xi})} \mathbb{E}_{\mathbf{a} \sim \pi_{\theta}(\mathbf{a}|\mathbf{s}, \boldsymbol{\xi}^{(0)})} \log \frac{1}{L+1} \sum_{\ell=0}^L \pi_{\theta}(\mathbf{a}|\mathbf{s}, \boldsymbol{\xi}^{(\ell)}),$$

and

$$\pi_{\theta}(\mathbf{a}|\mathbf{s}, \boldsymbol{\xi}^{(0):(L)}) = \frac{1}{L+1} \sum_{\ell=0}^L \pi_{\theta}(\mathbf{a}|\mathbf{s}, \boldsymbol{\xi}^{(\ell)}).$$

Notice that  $\boldsymbol{\xi}$ s are from the same distribution, so we have

$$\begin{aligned} \mathcal{H}_L &= \frac{1}{L+1} \sum_{i=0}^L \mathbb{E}_{\boldsymbol{\xi}^{(0), \dots, (L)} \sim p(\boldsymbol{\xi})} \mathbb{E}_{\mathbf{a} \sim \pi_{\theta}(\mathbf{a}|\mathbf{s}, \boldsymbol{\xi}^{(i)})} \log \frac{1}{L+1} \sum_{\ell=0}^L \pi_{\theta}(\mathbf{a}|\mathbf{s}, \boldsymbol{\xi}^{(\ell)}) \\ &= \mathbb{E}_{\boldsymbol{\xi}^{(0), \dots, (L)} \sim p(\boldsymbol{\xi})} \mathbb{E}_{\mathbf{a} \sim \pi_{\theta}(\mathbf{a}|\mathbf{s}, \boldsymbol{\xi}^{(0):(L)})} \log \pi_{\theta}(\mathbf{a}|\mathbf{s}, \boldsymbol{\xi}^{(0):(L)}). \end{aligned}$$

Use the identity that  $\mathbb{E}_{\mathbf{a} \sim \pi_{\theta}(\mathbf{a}|\mathbf{s})} = \mathbb{E}_{\boldsymbol{\xi}^{(0), \dots, (L)} \sim p(\boldsymbol{\xi})} \mathbb{E}_{\mathbf{a} \sim \pi_{\theta}(\mathbf{a}|\mathbf{s}, \boldsymbol{\xi}^{(0):(L)})}$ , we can rewrite  $\mathcal{H}$  as

$$\mathcal{H} = \mathbb{E}_{\boldsymbol{\xi}^{(0), \dots, (L)} \sim p(\boldsymbol{\xi})} \mathbb{E}_{\mathbf{a} \sim \pi_{\theta}(\mathbf{a}|\mathbf{s}, \boldsymbol{\xi}^{(0):(L)})} \log \pi_{\theta}(\mathbf{a}|\mathbf{s}).$$

Therefore, we have

$$\begin{aligned} \mathcal{H}_L - \mathcal{H} &= \mathbb{E}_{\boldsymbol{\xi}^{(0), \dots, (L)} \sim p(\boldsymbol{\xi})} \mathbb{E}_{\mathbf{a} \sim \pi_{\theta}(\mathbf{a}|\mathbf{s}, \boldsymbol{\xi}^{(0):(L)})} \log \frac{\pi_{\theta}(\mathbf{a}|\mathbf{s}, \boldsymbol{\xi}^{(0):(L)})}{\pi_{\theta}(\mathbf{a}|\mathbf{s})} \\ &= \text{KL}(\pi_{\theta}(\mathbf{a}|\mathbf{s}, \boldsymbol{\xi}^{(0):(L)}) || \pi_{\theta}(\mathbf{a}|\mathbf{s})) \geq 0. \end{aligned}$$

To compare between  $\mathcal{H}_L$  and  $\mathcal{H}_{L+1}$ , rewrite  $\mathcal{H}_L$  as

$$\mathcal{H}_L = \mathbb{E}_{\boldsymbol{\xi}^{(0), \dots, (L), (L+1)} \sim p(\boldsymbol{\xi})} \mathbb{E}_{\mathbf{a} \sim \pi_{\theta}(\mathbf{a}|\mathbf{s}, \boldsymbol{\xi}^{(0):(L)})} \log \pi_{\theta}(\mathbf{a}|\mathbf{s}, \boldsymbol{\xi}^{(0):(L)})$$

and  $\mathcal{H}_{L+1}$  as

$$\begin{aligned} \mathcal{H}_{L+1} &= \mathbb{E}_{\boldsymbol{\xi}^{(0), \dots, (L), (L+1)} \sim p(\boldsymbol{\xi})} \mathbb{E}_{\mathbf{a} \sim \pi_{\theta}(\mathbf{a}|\mathbf{s}, \boldsymbol{\xi}^{(0)})} \log \pi_{\theta}(\mathbf{a}|\mathbf{s}, \boldsymbol{\xi}^{(0):(L+1)}) \\ &= \mathbb{E}_{\boldsymbol{\xi}^{(0), \dots, (L), (L+1)} \sim p(\boldsymbol{\xi})} \mathbb{E}_{\mathbf{a} \sim \pi_{\theta}(\mathbf{a}|\mathbf{s}, \boldsymbol{\xi}^{(0):(L)})} \log \pi_{\theta}(\mathbf{a}|\mathbf{s}, \boldsymbol{\xi}^{(0):(L+1)}) \end{aligned}$$

and the difference will be

$$\begin{aligned} \mathcal{H}_L - \mathcal{H}_{L+1} &= \mathbb{E}_{\boldsymbol{\xi}^{(0), \dots, (L), (L+1)} \sim p(\boldsymbol{\xi})} \mathbb{E}_{\mathbf{a} \sim \pi_{\theta}(\mathbf{a}|\mathbf{s}, \boldsymbol{\xi}^{(0):(L)})} [\log \pi_{\theta}(\mathbf{a}|\mathbf{s}, \boldsymbol{\xi}^{(0):(L)}) - \log \pi_{\theta}(\mathbf{a}|\mathbf{s}, \boldsymbol{\xi}^{(0):(L+1)})] \\ &= \mathbb{E}_{\boldsymbol{\xi}^{(0), \dots, (L), (L+1)} \sim p(\boldsymbol{\xi})} \text{KL}(\pi_{\theta}(\mathbf{a}|\mathbf{s}, \boldsymbol{\xi}^{(0):(L)}) || \pi_{\theta}(\mathbf{a}|\mathbf{s}, \boldsymbol{\xi}^{(0):(L+1)})) \geq 0. \end{aligned}$$

Finally, we arrive at the conclusion that for any  $\ell$ , we have

$$\mathcal{H} \leq \mathcal{H}_{\ell+1} \leq \mathcal{H}_{\ell}.$$

## B Detailed pseudo code

---

### Algorithm 2 Implicit Distributional Actor-Critic (IDAC)

---

**Require:** Learning rate  $\lambda$ , batch size  $M$ , quantile number  $K$ , action number  $J$  and noise number  $L$ , target entropy  $\mathcal{H}_t$ .

Initial policy network parameter  $\theta$ , action-value function network parameter  $\omega_1, \omega_2$ , entropy parameter  $\eta$ .  
Initial target network parameter  $\tilde{\omega}_1 = \omega_1, \tilde{\omega}_2 = \omega_2$ .

**for** the number of environment steps **do**

Sample  $M$  number of transitions  $\{\mathbf{s}_t^i, \mathbf{a}_t^i, r_t^i, \mathbf{s}_{t+1}^i\}_{i=1}^M$  from the replay buffer

Sample  $\epsilon_t^{i,(k)}, \epsilon_{t+1}^{i,(k)}, \xi_{t+1}^{i,(\ell)}$  from  $\mathcal{N}(\mathbf{0}, \mathbf{I})$  for  $i = 1 \cdots M$  and  $k = 1 \cdots K$  and  $\ell = 0 \cdots L$ .

Sample  $\mathbf{a}_{t+1}^i \sim \pi_\theta(\cdot | \mathbf{s}_{t+1}^i, \xi_{t+1}^{i,(0)}) = \mathcal{N}(\mathcal{T}_\theta^1(\mathbf{s}_{t+1}^i, \xi_{t+1}^{i,(0)}), \mathcal{T}_\theta^2(\mathbf{s}_{t+1}^i, \xi_{t+1}^{i,(0)}))$  for  $i = 1 \cdots M$ .

Apply Bellman update to create samples (of return distribution)

$$y_{1,i,k} = r_t^i + \gamma G_{\tilde{\omega}_1}(\mathbf{s}_{t+1}^i, \mathbf{a}_{t+1}^i, \epsilon_{t+1}^{i,(k)}) \quad \# \text{ Calculate target values}$$

$$y_{2,i,k} = r_t^i + \gamma G_{\tilde{\omega}_2}(\mathbf{s}_{t+1}^i, \mathbf{a}_{t+1}^i, \epsilon_{t+1}^{i,(k)}) \quad \# \text{ Calculate target values}$$

and let

$$(\vec{y}_{1,i,1}, \dots, \vec{y}_{1,i,K}) = \text{StopGradient}(\text{sort}(y_{1,i,1}, \dots, y_{1,i,K})) \quad \# \text{ Obtain target quantile estimation}$$

$$(\vec{y}_{2,i,1}, \dots, \vec{y}_{2,i,K}) = \text{StopGradient}(\text{sort}(y_{2,i,1}, \dots, y_{2,i,K})) \quad \# \text{ Obtain target quantile estimation}$$

$$\vec{y}_{i,k} = \min(\vec{y}_{1,i,k}, \vec{y}_{2,i,k}), \text{ for } i = 1 \cdots M; k = 1 \cdots K$$

Generate samples  $x_{1,i,k} = G_{\omega_1}(\mathbf{s}_t^i, \mathbf{a}_t^i, \epsilon_t^{i,(k)})$  and  $x_{2,i,k} = G_{\omega_2}(\mathbf{s}_t^i, \mathbf{a}_t^i, \epsilon_t^{i,(k)})$ , and let

$$(\vec{x}_{1,i,1}, \dots, \vec{x}_{1,i,K}) = \text{sort}(x_{1,i,1}, \dots, x_{1,i,K})$$

$$(\vec{x}_{2,i,1}, \dots, \vec{x}_{2,i,K}) = \text{sort}(x_{2,i,1}, \dots, x_{2,i,K})$$

Update action-value function parameter  $\omega_1$  and  $\omega_2$  by minimizing the quantile loss

$$J(\omega_1, \omega_2) = \frac{1}{M} \sum_{i=1}^M \frac{1}{K^2} \sum_{k=1}^K \sum_{k'=1}^K \rho_{\tau_k}^\kappa(\vec{y}_{i,k} - \vec{x}_{1,i,k'}) + \frac{1}{M} \sum_{i=1}^M \frac{1}{K^2} \sum_{k=1}^K \sum_{k'=1}^K \rho_{\tau_k}^\kappa(\vec{y}_{i,k} - \vec{x}_{2,i,k'}).$$

Sample  $\Xi_t^{i,h}, \epsilon_t^{i,(j)}$  from  $\mathcal{N}(\mathbf{0}, \mathbf{I})$ , for  $i = 1 \cdots M, j = 1 \cdots J$  and  $h = 0 \cdots L + J$ , and form  $\xi_t^{i,(j,\ell)}$  from  $\Xi_t^{i,h}$  by concatenating  $L$  of them to the rest of  $J$ s. Sample  $\mathbf{a}_t^{i,(j)} \sim \pi_\theta(\cdot | \mathbf{s}_t^i, \xi_t^{i,(j,0)}) = \mathcal{N}(\mathcal{T}_\theta^1(\mathbf{s}_t^i, \xi_t^{i,(j,0)}), \mathcal{T}_\theta^2(\mathbf{s}_t^i, \xi_t^{i,(j,0)}))$  using

$$\mathbf{a}_t^{i,(j)} = \mathcal{T}_\theta(\mathbf{s}_t^i, \xi_t^{i,(j,0)}, \mathbf{e}_t^i) = \mathcal{T}_\theta^1(\mathbf{s}_t^i, \xi_t^{i,(j,0)}) + \mathbf{e}_t^i \odot \mathcal{T}_\theta^2(\mathbf{s}_t^i, \xi_t^{i,(j,0)}), \mathbf{e}_t^i \sim \mathcal{N}(\mathbf{0}, \mathbf{I})$$

for  $i = 1, \dots, M$ .

Update the policy function parameter  $\theta$  by minimizing

$$J(\theta) = -\frac{1}{M} \sum_{i=1}^M \left\{ \frac{1}{2J} \sum_{z=1}^2 \sum_{j=1}^J G_{\omega_z}(\mathbf{s}_t^i, \mathbf{a}_t^{i,(j)}, \epsilon_t^{i,(j)}) - \exp(\eta) \sum_{j=1}^J \frac{1}{J} \left[ \log \frac{\sum_{\ell=0}^L \pi_\theta(\mathbf{a}_t^{i,(j)} | \mathbf{s}_t^i, \xi_t^{i,(j,\ell)})}{L+1} \right] \right\}.$$

We also use stop gradient on  $(\mathcal{T}_\theta^1(\mathbf{s}_t^i, \xi_t^{i,(j)}), \mathcal{T}_\theta^2(\mathbf{s}_t^i, \xi_t^{i,(j)}))$  to reduce variance on gradient as mentioned in Eq (16).

Update the log entropy parameter  $\eta$  by minimizing

$$J(\eta) = \frac{1}{M} \sum_{i=1}^M [\text{StopGradient}(-\log \frac{\sum_{\ell=0}^L \pi_\theta(\mathbf{a}_t^{i,(0)} | \mathbf{s}_t^i, \xi_t^{i,(\ell)})}{L+1}) - \mathcal{H}_t] \eta$$

**end for**

---

## C Hyperparameters of IDAC

Table 3: IDAC hyperparameters

| Parameter                              | Value                                                |
|----------------------------------------|------------------------------------------------------|
| Optimizer                              | Adam                                                 |
| learning rate                          | 3e-4                                                 |
| discount                               | 0.99                                                 |
| replay buffer size                     | $10^6$                                               |
| number of hidden layers (all networks) | 2                                                    |
| number of hidden units per layer       | 256                                                  |
| number of samples per minibatch        | 256                                                  |
| entropy target                         | $-\dim(\mathcal{A})$ (e.g., $-6$ for HalfCheetah-v2) |
| nonlinearity                           | ReLU                                                 |
| target smoothing coefficient           | 0.005                                                |
| target update interval                 | 1                                                    |
| gradient steps                         | 1                                                    |
| distribution of $\xi$                  | $\mathcal{N}(\mathbf{0}, \mathbf{I}_5)$              |
| distribution of $\epsilon$             | $\mathcal{N}(\mathbf{0}, \mathbf{I}_5)$              |
| J                                      | 51                                                   |
| K                                      | 51                                                   |
| L                                      | 21                                                   |

## D Additional ablation study

Additional ablation studies on Ant is shown in Fig. 4a for a thorough comparison. In Ant, the performance of IDAC is on par with that of IDAC-Gaussian, which outperforms the other variants.

Furthermore, we would like to learn the interaction between DGN and SIA by running ablation studies by holding each of them as a control factor; we conduct the corresponding experiments on Walker2d. From Fig. 4b, we can observe that by removing either SIA (resulting in IDAC-Gaussian) or DGN (resulting in IDAC-noDGN) from IDAC in general negatively impacts its performance, which echoes our motivation that we integrate DGN and SIA to allow them to help strengthen each other: (i) Modeling  $G$  exploits distributional information to help better estimate its mean  $Q$  (note C51, which outperforms DQN by exploiting distributional information, also conducts its argmax operation on  $Q$ ); (ii) A more flexible policy may become more necessary given a better estimated  $Q$ .

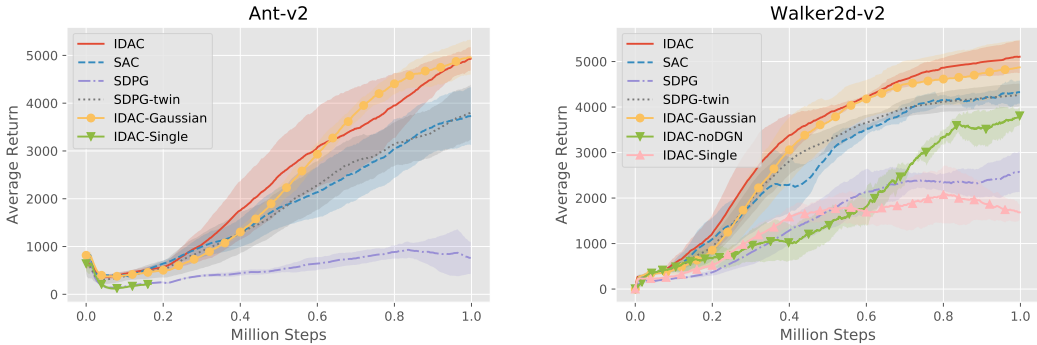

(a) Additional ablation study on Ant

(b) Additional ablation study on Walker2d

Figure 4: Additional plots for ablation study

## E Additional comparison with SDPG

In Fig. 5, we include a thorough comparison with SDPG (implemented based on the *stable baselines* codebase).

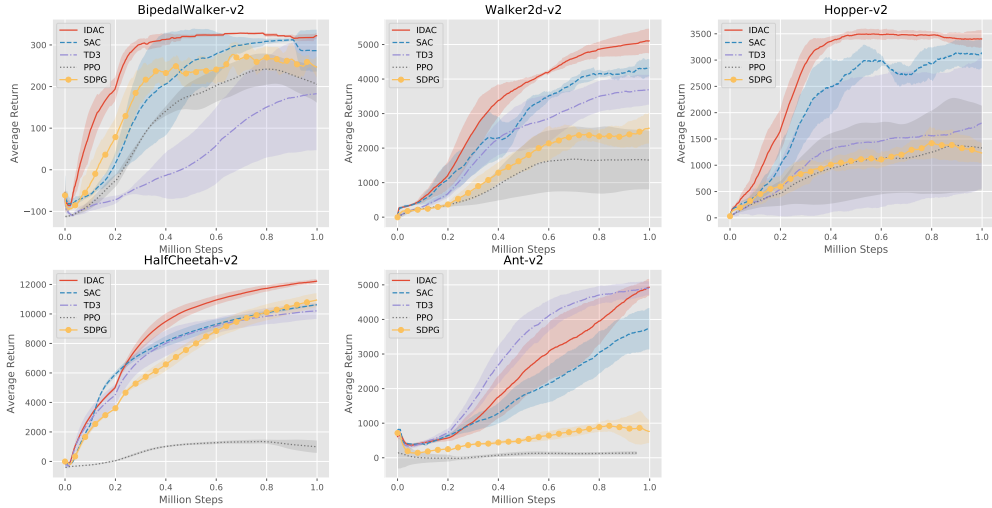

Figure 5: Training curves on continuous control benchmarks. The solid line is the average performance over 4 seeds with  $\pm 1$  std shaded, and with a smoothing window of length 100.

## F Late stage policy visualization

We show in Fig. 6 the visualization of the late stage policy of one seed from Walker2d-v2 environment. We can see that SIA does provide a more flexible policy even in the late stage, where the correlations between action dimensions is clear on plot, and the marginal distributions are more flexible than a Gaussian distribution. Moreover, we randomly choose 1000 states and conduct normality tests as well as correlation tests on them. As a result, **all** of the tests indicate that the SIA policy captures the non-zero correlations between the selected dimensions, and the marginal distributions for each dimension across different states are significantly non-normal.

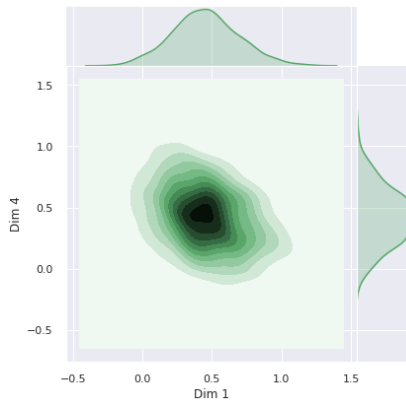

Figure 6: Visualization of the SIA on Walker2d-v2. The density contour of 1000 randomly sampled actions at a late training stage, where the x- and y-axis correspond to dimensions 1 and 4, respectively.
